# Supplementary material
Source: PubMed Central journal article supplement (PMC4999928)
Supplement: JB.00464-16_zjb999094169so1.pdf [file JB.00464-16_zjb999094169so1.pdf]

1 Supporting information for

2 **Single-stranded DNA uptake during gonococcal**

3 Christof Hepp, Heike Gangel, Katja Henseler, Niklas Günther, Berenike Maier\*

4

5

## 6 Supporting Figures

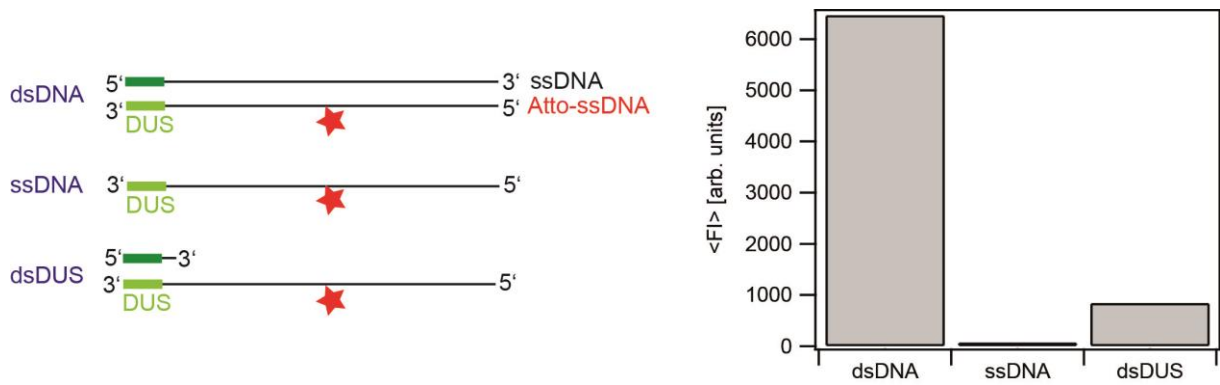

7

8 **Fig. S1. Mid-labeling confirms that the import efficiency of ssDNA is increased by**

9 **dsDUS.** Gonococci (*ΔpilV*, Ng005) were incubated for 1 h with DNA fragments containing a

10 single dye molecule at the center of the fragment. Subsequently they were treated with DNase

11 I. The fragments consisted of dsDNA, ssDNA, or ssDNA with 16 b complementary

12 oligonucleotide containing DUS. Average fluorescence intensity of individual cells. (N > 500

13 for each condition)

14

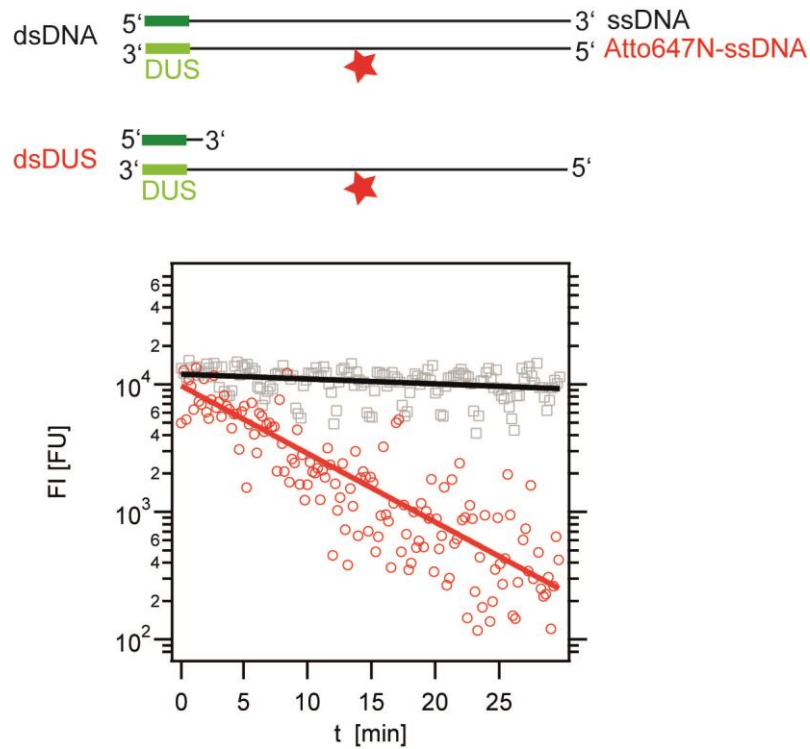

15

16 **Fig. S2 Decay of imported dsDNA and dsDUS DNA.** Gonococci (*ΔpilV*, Ng005) were  
 17 incubated for 1 h with DNA fragments containing a single dye molecule at the center of the  
 18 fragment. Single cell fluorescence intensity was monitored starting immediately after DNA  
 19 removal. Cells were not treated with DNase. Grey: dsDNA, red: dsDUS. Full lines are  
 20 exponential fits to the data.

21

22

23

24

25

26

27

28 **Tables**

| <b>Strain</b>                                 | <b>Relevant genotype</b>                                                | <b>Source/Reference</b> |
|-----------------------------------------------|-------------------------------------------------------------------------|-------------------------|
| MS11<br>Ng001                                 | <i>wild type</i>                                                        |                         |
| GV1 ( $\Delta pilV$ )<br>Ng005                | <i>recA6ind(tetM) pilVfs (G-1)</i>                                      | (31)                    |
| $\Delta pilQ \Delta pilV$<br>Ng055            | <i>pilQ::m-Tn3cm</i><br><i>recA6ind(tetM) pilVfs</i>                    | (21) (24)               |
| $\Delta pilT \Delta pilV$<br>Ng056            | <i>pilT::m-Tn3cm</i><br><i>recA6ind(tetM) pilVfs</i>                    | (21) (43)               |
| MS11 $\Delta nuc$<br>Ng164                    | <i>nuc::kan</i>                                                         | This study              |
| $\Delta nuc \Delta pilV$<br>Ng058             | <i>nuc::kan</i><br><i>recA6ind(tetM) pilVfs</i>                         | This study              |
| $\Delta pilQ \Delta nuc \Delta pilV$<br>Ng163 | <i>pilQ::m-Tn3cm</i><br><i>nuc::kan</i><br><i>recA6ind(tetM) pilVfs</i> | This study              |
| $\Delta pilT \Delta nuc \Delta pilV$<br>Ng162 | <i>pilT::m-Tn3cm</i><br><i>nuc::kan</i><br><i>recA6ind(tetM) pilVfs</i> | This study              |

29

30 **Table 1 Bacterial strains used in this study**

31

|                          | Sequence                                                                                                                                                                                                                                                                                                                             |
|--------------------------|--------------------------------------------------------------------------------------------------------------------------------------------------------------------------------------------------------------------------------------------------------------------------------------------------------------------------------------|
| <b>Cy5-ssDNA-end</b>     | 5'-Cy5-CTCCTGACTGTTTCGCGCCCAGAATAAAAATCCATCGCTGACTGC<br>GTATCCAGCTCACTCTCAATGGTGGCGGCATACATCGCCTTCACATTC<br>AGACGGCAT-3'                                                                                                                                                                                                             |
| <b>Atto647-ssDNA-mid</b> | 5'-CTCCTGACTGTTTCGCGCCCAGAATAAAAATCCATCGC[T-<br>Atto647N]GACTGCGTATCCAGCTCACTCTCAATGGTGGCGGCATACATC<br>GCCTTCACATTCAGACGGCAT-3'                                                                                                                                                                                                      |
| <b>oligo Watson-DUS</b>  | 5'-ATGCCGTCTGAATGTG-3'                                                                                                                                                                                                                                                                                                               |
| <b>oligo control</b>     | 5'-TGTGAAGGCGATGTATG-3'                                                                                                                                                                                                                                                                                                              |
| <b>HG1</b>               | 5'ATGGCTAAAATGAGAATATCACCGGAATTGAAAAAACTG3'                                                                                                                                                                                                                                                                                          |
| <b>HG2</b>               | 5'CTAAAACAATTCATCCAGTAAAATATAATATTTTATTTTCTCCCAAT<br>CAG 3'                                                                                                                                                                                                                                                                          |
| <b>HG3</b>               | 5'ATGCCGTCTGAAGTCCCTGAACGAAGTGTCCGGTTTG 3'                                                                                                                                                                                                                                                                                           |
| <b>HG4</b>               | 5'CAGTTTTTTTCAATTCCGGTGATATTCTCATTTTAGCCATCTCTGAACC<br>GGATTCAGACGGCATC 3'                                                                                                                                                                                                                                                           |
| <b>HG5a</b>              | 5'CTGATTGGGAGAAAATAAAAATATTATATTTTACTGGATGAATTGTTT<br>TAGAGACACCGCACGGCCTTGAACG 3'                                                                                                                                                                                                                                                   |
| <b>HG6</b>               | 5'ATGCCGTCTGAACCCGAGTTGGCGATCAGTGCC 3'                                                                                                                                                                                                                                                                                               |
| <b>HG11</b>              | 5'ACTGCCCCGTGGAAGCCGTCG 3'                                                                                                                                                                                                                                                                                                           |
| <b>HG12</b>              | 5'GGACGAAAAACGGAACCACACATACG 3'                                                                                                                                                                                                                                                                                                      |
| <b>ngch_L01</b>          | 5'CGCGGTAATCAGGGTGGCGACCTCTTGGCTGGCGAGCATTTTTTCAA<br>AACGTGCTTTTTTCGACGTTCAAATTTTACCTTTGAGCGGCAAAATCG<br>CTTGGAATTTGCGGTCGCGGCCCTGCATGGCGGAACCGCCTGCGGAGT<br>TGCCCTCGACGAGGTAGAGTTCAGACAGGGCAGGGTCTTTTTCTTGGC<br>AGTCGGCGAGTTTGCCGGGCAGTCCCAAGCCGTCCATCACGCCTTGC<br>GGCGGGTGATTCGCGGGCTTTGCGGGCGGCTTCGCGTGCGCGGGCGG<br>CTTCAGACGGCAT |
| <b>kh33</b>              | 5'ATGCCGTCTGAAGCCGCCCGCGCACGC                                                                                                                                                                                                                                                                                                        |
| <b>kh34</b>              | 5'CGCGGTAATCAGGGTGGCGAC                                                                                                                                                                                                                                                                                                              |
